## Poster presentations

218

### SWALLOWING/COMMUNICATION SCREENING IN OLDER ADULTS ATTENDING THE EMERGENCY DEPARTMENT AND ASSOCIATION WITH CLINICAL FRAILTY SCALE SCORES

Orla Boyle<sup>1,2</sup>, Louise Kelly<sup>2</sup>, Maeve Ryan<sup>2</sup>, Deirdre Brady<sup>2</sup>, Ruth Wade<sup>2</sup>, Catriona Whelan<sup>2</sup>, Orlaith Doherty<sup>2</sup>, Maeve Murphy<sup>3</sup>, Sarah Mello<sup>2</sup>, Paul McElwaine<sup>2</sup>, James Gray<sup>4</sup>, Sean Kennelly<sup>2</sup>, Derek Hayden<sup>2</sup>

<sup>1</sup>Department of Speech and Language Therapy, Tallaght University Hospital, Tallaght, Dublin 24, Ireland

<sup>2</sup>Department of Age Related Healthcare, Tallaght University Hospital, Tallaght, Dublin 24, Ireland

<sup>3</sup>Health and Social Care Professions Manager, Tallaght University Hospital, Tallaght, Dublin 24, Ireland

<sup>4</sup>Department of Emergency Medicine, Tallaght University Hospital, Tallaght, Dublin 24, Ireland

**Background:** Dysphagia, frailty and negative patient outcomes are interlinked<sup>1</sup>. Changes in communication may result from the ageing process, chronic conditions, and/or neurologic conditions presenting in later years<sup>2</sup>. However, unlike other cohorts, including stroke, frail older patients are not routinely screened for swallowing/communication difficulties in acute settings. We investigated the proportion of Speech and Language Therapy (SLT)

referrals generated for older patients attending our Emergency Department (ED) following use of a swallowing/communication screening tool and their association with Clinical Frailty Scale (CFS) scores.

**Methods:** A retrospective analysis of data collected over a four week period was completed. Older patients presenting to ED were screened by the interdisciplinary gerontological ED team using a screening tool, including a locally developed swallow/communication screen. Statistical analyses were performed using STATA Version 12.

**Results:** Of 176 patients screened (mean age 81.8 years, SD 5.9 years), median CFS score was 5 (IQR 3–6). Thirty-seven percent (66/176) of patients were referred for SLT assessment following initial screen. SLT referrals were more commonly required in patients with a CFS score of  $\geq 4$  (46.2% vs. 19.3%,  $P=0.001$ ) and likelihood of requiring SLT referral increased with greater CFS score ( $P<0.0001$ ).

**Conclusion:** Results suggest that screening for swallowing and communication difficulties in older patients yields a high level of SLT referrals, with a higher frequency of SLT referrals observed with increasing frailty scores. Further research is required to determine the optimum swallowing/communication screening tool in the acute setting. Future research will focus on evaluating outcomes of SLT assessments completed and determining the prevalence of swallowing and/or communication difficulties in this cohort.

#### References:

1. Smithard, D. G. (2016). Dysphagia: A Geriatric Giant? Available at <http://medical-clinical-reviews.imedpub.com/dysphagia-a-geriatric-giant.pdf> (Accessed 25/04/2019).
2. Yorkston, K., Bourgeois, M. S. & Baylor, C. R. (2010). Communication and Ageing. *Physical Medicine and Rehabilitation Clinics of North America*, 21 (2), 309–319.
